# Supplementary material
Source: publisher figshare collection journal article supplement (https://sage.figshare.com/ndownloader/files/38942776)
Supplement: Supplementary file 1 [file 38942776]

## Sheet: Sheet1
s.no	NCBI-SRA accession ID	Bio-project ID	Bio-sample ID	Submitted by	Submission date	Source	Type of Cancer	Organism	Sex of patient	sample type	Geographic location/ethnicity	Age of patient	Strategy	condition of patients/disease stage	Tissue	cell type/cell lines	Scope	Relevance of experiment
1	SRR894452	PRJNA207681	SAMN02192043	ZHONGSHAN HOSPITAL,, FUDAN UNIVERSITY	2013-06-07	GENOMIC	Intrahepatic cholangiocarcinoma	Homo sapiens	male	tumor	China,Shanghai	63	WXS		Liver	-	Multiisolate	Medical
2	SRR900123	PRJNA207681	SAMN02192051	ZHONGSHAN HOSPITAL, FUDAN UNIVERSITY	2013-06-07	GENOMIC	Intrahepatic cholangiocarcinoma	Homo sapiens	male	tumor	China,Shanghai	54	WXS		Liver	-	Multiisolate	Medical
3	SRR900099	PRJNA207681	SAMN02192049	ZHONGSHAN HOSPITAL, FUDAN UNIVERSITY	2013-06-07	GENOMIC	Intrahepatic cholangiocarcinoma	Homo sapiens	female	tumor	China,Shanghai	68	WXS		Liver	-	Multiisolate	Medical
4	SRR941051	PRJNA173904	SAMN01797227	Genome Research Foundation	2012-08-27	GENOMIC	Intrahepatic cholangiocarcinoma	Homo sapiens	No attributes	tumor	Korea	No attributes	WXS		Intestine	-	Monoisolate	Medical
5	SRR941052	PRJNA173904	SAMN01797364	Genome Research Foundation	2012-08-27	GENOMIC	Human Diffuse Type Gastric Cancer	Homo sapiens	No attributes	tumor	Korea	No attributes	WXS		No attributes	-	Monoisolate	Medical
6	SRR941053	PRJNA173904	SAMN01797756	Genome Research Foundation	2012-08-27	GENOMIC	Human Diffuse Type Gastric Cancer	Homo sapiens	No attributes	tumor	Korea	No attributes	WXS		No attributes	-	Monoisolate	Medical
7	SRR941054	PRJNA173904	SAMN01798293	Genome Research Foundation	2012-08-27	GENOMIC	Human Diffuse Type Gastric Cancer	Homo sapiens	No attributes	tumor	Korea	No attributes	WXS		No attributes	-	Monoisolate	Medical
8	ERR166303	PRJEB3235	SAMEA2025069	Centro Nacional de Investigaciones Oncologicas (CNIO)	9-Aug-2013	GENOMIC	Non BRCA1/BRCA2 familial breast cancer	Homo sapiens	female	-	-	-	WXS	-	-	lymphocyte	Monoisolate	-
9	ERR166304	PRJEB3235	SAMEA2025066	Centro Nacional de Investigaciones Oncologicas (CNIO)	9-Aug-2013	GENOMIC	Non BRCA1/BRCA2 familial breast cancer	Homo sapiens	female	-	-	-	WXS	-	-	lymphocyte	Monoisolate	-
10	ERR166307	PRJEB3235	SAMEA2025078	Centro Nacional de Investigaciones Oncologicas (CNIO)	9-Aug-2013	GENOMIC	Non BRCA1/BRCA2 familial breast cancer	Homo sapiens	female	-	-	-	WXS	-	-	lymphocyte	Monoisolate	-
11	ERR166310	PRJEB3235	SAMEA2025077	Centro Nacional de Investigaciones Oncologicas (CNIO)	9-Aug-2013	GENOMIC	Non BRCA1/BRCA2 familial breast cancer	Homo sapiens	female	-	-	-	WXS	-	-	lymphocyte	Monoisolate	-
12	ERR166312	PRJEB3235	SAMEA2025067	Centro Nacional de Investigaciones Oncologicas (CNIO)	9-Aug-2013	GENOMIC	Non BRCA1/BRCA2 familial breast cancer	Homo sapiens	female	-	-	-	WXS	-	-	lymphocyte	Monoisolate	-
13	ERR166335	PRJEB3235	SAMEA2025079	Centro Nacional de Investigaciones Oncologicas (CNIO)	9-Aug-2013	GENOMIC	Non BRCA1/BRCA2 familial breast cancer	Homo sapiens	female	-	-	-	WXS	-	-	lymphocyte	Monoisolate	-
14	ERR166336	PRJEB3235	SAMEA1969502	Centro Nacional de Investigaciones Oncologicas (CNIO)	9-Aug-2013	GENOMIC	Non BRCA1/BRCA2 familial breast cancer	Homo sapiens	female	-	-	-	WXS	-	-	lymphocyte	Monoisolate	-
15	ERR035487	PRJEB2556	SAMEA1030497	Cancer Research UK, Cambridge Research Institute (CRUK-CRI)	10-Oct-2011	GENOMIC	High-grade serous ovarian cancer	Homo sapiens	female	-	-	-	WXS	Relapse	-	Ovarian cancer line PEO4	Monoisolate	-
16	ERR035488	PRJEB2556	SAMEA1030498	Cancer Research UK, Cambridge Research Institute (CRUK-CRI)	2011-11-03	GENOMIC	High-grade serous ovarian cancer	Homo sapiens	Female	-	-	-	WXS	Relapse	-	Ovarian cancer line PEO14	Monoisolate	-
17	ERR035489	PRJEB2556	SAMEA1030495	Cancer Research UK, Cambridge Research Institute (CRUK-CRI)	2011-11-03	GENOMIC	High-grade serous ovarian cancer	Homo sapiens	Female	-	-	-	WXS	Relapse	-	Ovarian cancer line PEO23	Monoisolate	-
18	ERR232253	PRJEB1487	SAMEA1713747	ICR-T_Robins	2013-03-01	GENOMIC	BRCA2 deficient human pancreatic cancer	Homo Sapiens	-	-	-	-	Other	-	Liver	CAPAN1 cell line	Monoisolate	Research
19	ERR232254	PRJEB1487	SAMEA1713750	ICR-T_Robins	2013-03-01	GENOMIC	BRCA2 deficient human pancreatic cancer	Homo Sapiens	-	-	-	-	Other	-	Liver	CAPAN1 cell line	Monoisolate	Research
20	ERR232255	PRJEB1487	SAMEA1713745	ICR-T_Robins	2013-03-01	GENOMIC	BRCA2 deficient human pancreatic cancer	Homo Sapiens	-	-	-	-	Other	-	Liver	CAPAN1 cell line	Monoisolate	Research
